# Supplementary material for: Characterization of K-Complexes and Slow Wave Activity in a Neural Mass Model
Source: PubMed Central journal article supplement (PMC4230734; doi:10.1371/journal.pcbi.1003923), 2014-11-13
Supplement: pcbi.1003923.s002.pdf [file pcbi.1003923.s002.pdf]

## Supporting Information Tables

### Table S1 Parameter values

This table defines all constants used within the model, that are not described elsewhere.

**Table 1. Parameter definitions**

| Symbol               | Value   | Unit                      | Description                         |
|----------------------|---------|---------------------------|-------------------------------------|
| $\tau_e, \tau_i$     | 30      | ms                        | membrane rise time                  |
| $Q_e^{max}$          | 30E-3   | ms <sup>-1</sup>          | maximal firing rate                 |
| $Q_i^{max}$          | 60E-3   | ms <sup>-1</sup>          | maximal firing rate                 |
| $\theta_e, \theta_i$ | -58.5   | mV                        | firing threshold                    |
| $\sigma_i$           | 6       | mV                        | firing rate deviation               |
| $\gamma_e$           | 70E-3   | ms <sup>-1</sup>          | synaptic rate constant              |
| $\gamma_i$           | 58.6E-3 | ms <sup>-1</sup>          | synaptic rate constant              |
| $N_{ee}$             | 120     | -                         | connectivity e-e                    |
| $N_{ei}$             | 72      | -                         | connectivity e-i                    |
| $N_{ie}$             | 90      | -                         | connectivity i-e                    |
| $N_{ii}$             | 90      | -                         | connectivity i-i                    |
| $C_m$                | 1       | $\mu\text{F}/\text{cm}^2$ | membrane capacity                   |
| $g_L$                | 1       | $\text{mS}/\text{cm}^2$   | channel conductivity                |
| $E_{Le}, E_{Li}$     | -66,-64 | mV                        | reversal potential                  |
| $E_K$                | -100    | mV                        | reversal potential                  |
| $E_{AMPA}$           | 0       | mV                        | reversal potential                  |
| $E_{GABA}$           | -70     | mV                        | reversal potential                  |
| $\alpha_{Na}$        | 2       | mM/ mA ms                 | sodium influx                       |
| $\tau_{Na}$          | 1       | ms                        | sodium time constant                |
| $R_{pump}$           | 0.09    | mM ms <sup>-1</sup>       | sodium pump capacity                |
| $Na_{eq}$            | 9.5     | mM                        | sodium resting state                |
| $\phi_n$             | 120E-3  | ms <sup>-1</sup>          | background noise standard deviation |
