# Supplementary material for: Characterization of K-Complexes and Slow Wave Activity in a Neural Mass Model
Source: PubMed Central journal article supplement (PMC4230734; doi:10.1371/journal.pcbi.1003923), 2014-11-13
Supplement: pcbi.1003923.s003.pdf [file pcbi.1003923.s003.pdf]

## Supporting Information

### Text S1 Model equations

The basic neural column described in Methods is given by the following set of equations:

$$\begin{aligned}
 \tau_e \dot{V}_e &= -I_L - I_{AMPA}(s_{ee}) - I_{GABA}(s_{ie}) - \tau_e C_m^{-1} I_{KNa}, \\
 \tau_i \dot{V}_i &= -I_L - I_{AMPA}(s_{ei}) - I_{GABA}(s_{ii}), \\
 \ddot{s}_{ee} &= \gamma_e^2 (N_{ee} Q_e(V_e) + \phi_n - s_{ee}) - 2\gamma_e \dot{s}_{ee}, \\
 \ddot{s}_{ie} &= \gamma_i^2 (N_{ie} Q_i(V_i) - s_{ie}) - 2\gamma_i \dot{s}_{ie}, \\
 \ddot{s}_{ei} &= \gamma_e^2 (N_{ei} Q_e(V_e) + \phi'_n - s_{ei}) - 2\gamma_e \dot{s}_{ei}, \\
 \ddot{s}_{ii} &= \gamma_i^2 (N_{ii} Q_i(V_i) - s_{ii}) - 2\gamma_i \dot{s}_{ii}, \\
 \dot{[Na]} &= (\alpha_{Na} Q_e(V_e) - Na_{\text{pump}}([Na])) / \tau_{Na}.
 \end{aligned}$$

The currents are given by the following equations:

$$\begin{aligned}
 I_L &= g_L (V_k - E_L), \\
 I_{AMPA} &= g_{AMPA} s_{ek} (V_k - E_{AMPA}), \\
 I_{GABA} &= g_{GABA} s_{ik} (V_k - E_{GABA}), \\
 I_{KNa} &= g_{KNa} \frac{0.37}{1 + \left(\frac{38.7}{[Na]}\right)^{3.5}} (V_e - E_K).
 \end{aligned}$$

The sodium pump is described by:

$$Na_{\text{pump}}([Na]) = R_{\text{pump}} \left( \frac{[Na]^3}{[Na]^3 + 3375} - \frac{[Na]_{eq}^3}{[Na]_{eq}^3 + 3375} \right).$$
